# Supplementary material for: Physics-based bias-dependent compact modeling of 1/f noise in single- to few-layer 2D-FETs
Source: Royal Society of Chemistry journal article supplement (doi:10.1039/d3nr00922j), 2023-01-01
Supplement: d3nr00922j1.pdf [file d3nr00922j1.pdf]

## Supporting Information

### Physics-based bias-dependent compact modeling of $1/f$ noise in single- to few- layer 2D-FETs

Nikolaos Mavredakis<sup>\*a</sup>, Anibal Pacheco-Sanchez<sup>a</sup>, Md Hasibul Alam<sup>b</sup>, Anton Guimerà-Brunet<sup>c,d</sup>, Javier Martinez<sup>c</sup>, Jose Antonio Garrido<sup>e,f</sup>, Deji Akinwande<sup>b</sup> and David Jiménez<sup>a</sup>

<sup>a</sup> Departament d'Enginyeria Electrònica, Escola d'Enginyeria, Universitat Autònoma de Barcelona, Bellaterra 08193, Spain

<sup>b</sup> Department of Electrical and Computer Engineering, The University of Texas, Austin, TX 78758, USA

<sup>c</sup> Instituto de Microelectrónica de Barcelona, IMB-CNM (CSIC), Esfera UAB, Bellaterra, Spain

<sup>d</sup> Centro de Investigación Biomédica en Red en Bioingeniería, Biomateriales y Nanomedicina (CIBER-BBN), Madrid, Spain

<sup>e</sup> Catalan Institute of Nanoscience and Nanotechnology (ICN2), CSIC, Barcelona Institute of Science and Technology, Campus UAB, Bellaterra, Barcelona, Spain

<sup>f</sup> ICREA, Pg. Lluís Companys 23, 08010 Barcelona, Spain

\* Email: nikolaos.mavredakis@uab.cat

#### SECTION S.1 Definitions of basic quantities of the $IV$ model

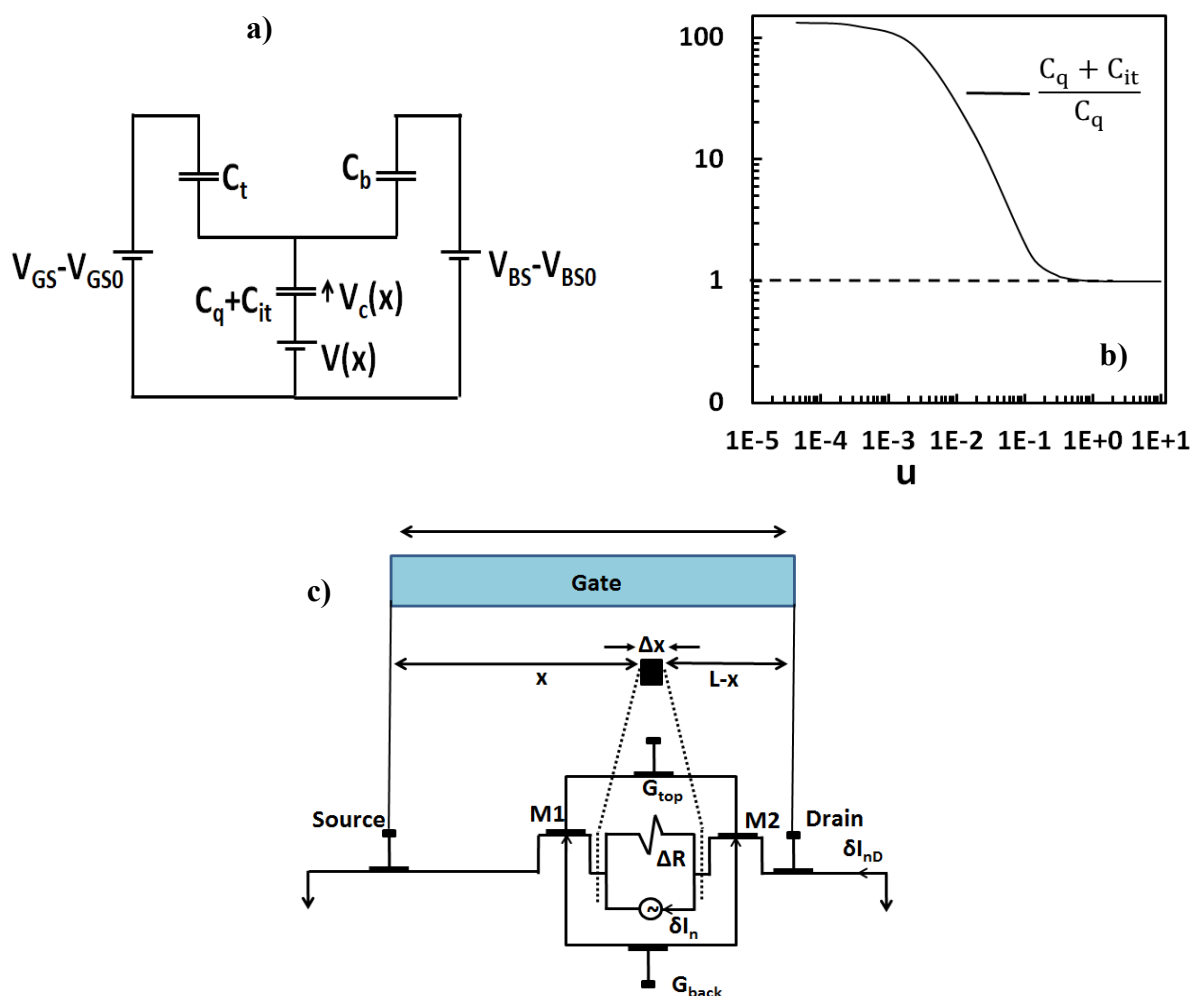

Fig. S1. a) Capacitive circuit of a 2D-FET, b) quantum-interface trap capacitance related term  $(C_q + C_{it})/C_q$  vs. normalized charge  $u$  and c) the equivalent circuit for a local current noise contribution to the total noise is illustrated. Each noise-generating slice of the channel is connected to two noiseless 2D-FETs, M1 and M2 respectively.

Notice that as mentioned in the main manuscript, we present equations for n-type 2DFETs to simplify the analysis which can be easily adjusted to p-type devices.<sup>63</sup> Fig. S1a depicts the

equivalent capacitive circuit of the CV-IV chemical potential ( $V_c$ ) based model<sup>63</sup> from where the basic electrostatics can be derived as:<sup>57-58, 63</sup>

$$-Q_{2D}(x) - Q_{it}(x) = C_t(V_{GS} - V_{GS0} - \psi(x)) + C_b(V_{BS} - V_{BS0} - \psi(x)) \quad (S1)$$

where  $Q_{2D}$  is the overall net mobile sheet,  $Q_{it}(x)$  is the interface trap charge,  $C_{t,b}$  is the top(back)-dielectric capacitance per unit area, while  $V_{G(S)B}$  is the top(back)-gate voltage with  $V_{G(S)B0}$  the flat band top(back)-gate voltage<sup>63</sup>.  $\psi$  is the electrostatic potential with  $\psi(x) = V(x) + V_c(x) \leftrightarrow e \cdot V_c(x) = -e \cdot V(x) + e \cdot \psi(x) = E_F(x) - E_C(x)$ <sup>57-58</sup> where  $V$  is the channel potential and  $V_c(x)$  symbolizes the shift of the quasi-fermi level  $E_F(x)$  with  $E_C(x)$  the conduction band edge,  $e$  the electron charge and  $x$  the channel position;  $V(x=0) = V_s$ ,  $V_c(x=0) = V_{cs}$  at source side and  $V(x=L) = V_d$ ,  $V_c(x=L) = V_{cd}$  at drain side, respectively.<sup>57-58, 63</sup>.  $Q_{2D}$  is defined as:<sup>63</sup>

$$Q_{2D}(x) = -C_{dq} U_T u(V_c), \quad u(V_c) = \ln\left(1 + e^{\frac{V_c}{U_T}}\right) \quad (S2)$$

where  $U_T$  is the thermal voltage,  $u$  is a normalized charge term,  $C_{dq} = e^2 \cdot D_{os}$  is the degenerated quantum capacitance, which corresponds to its upper-limit value when the carrier density becomes heavily degenerated;  $D_{os} = g_k \cdot m^k / (2\pi \cdot h^2) + g_Q \cdot m^Q / (2\pi \cdot h^2) e^{[\Delta E2/KT]}$  is the 2D density of states with  $h$  the reduced Planck constant ( $=1.05 \cdot 10^{-34}$  J.s),  $g_{k,Q}$  the degeneracy factor and  $m^{k,Q}$  the conduction band effective mass at the  $k, Q$  band valley, respectively where  $\Delta E2$  is the energy separation between  $k, Q$  bands,  $K$  the Boltzmann constant and  $T$  the temperature<sup>58, 60, 63</sup>.  $V_{cs(d)}$  at source (drain) side, can be derived from Equations S1-S2 after applying a self-consistent solution.<sup>63</sup> Quantum capacitance  $C_q$  is defined as the derivative of  $Q_{2D}$  over  $V_c$  ( $C_q = -dQ_{2D}/dV_c$ <sup>58, 63</sup>) and after expanding the later by considering Equation S2:

$$C_q = \frac{-dQ_{2D}}{dV_c} = \frac{-dQ_{2D}}{du} \frac{du}{dV_c} = C_{dq} \frac{e^{V_c/U_T}}{(1 + e^{V_c/U_T})} \quad (S3)$$

$$u(V_c) = \ln\left(1 + e^{V_c/U_T}\right) \rightarrow e^{V_c/U_T} = e^u - 1 \quad (S4)$$

and thus, from Equations S3-S4:

$$C_q = C_{dq} \frac{e^u - 1}{e^u} = C_{dq} (1 - e^{-u}), \quad \frac{dV_c}{du} = \frac{C_{dq} U_T}{C_q} \quad (S5)$$

From Equation S1:

$$\frac{d\psi}{dV_c} = -\frac{C_q + C_{it}}{C} \rightarrow \frac{d(V + V_c)}{dV_c} = \frac{C_q + C_{it}}{C} \rightarrow \frac{dV}{dV_c} = -\frac{C_q}{C} - 1 = -\left(\frac{C_q + C_{it} + C}{C}\right) \quad (S6)$$

where  $C = C_t + C_b$  and  $C_{it} = -dQ_{it}/dV_c$  is the interface trap capacitance<sup>58, 63</sup>. From Drift-Diffusion  $I_D$  definition<sup>63</sup> and from Equations S3-S6:

$I_D$

$$\begin{aligned}
&= -W|Q_{2D}|\mu_{eff}E = W|Q_{2D}|\frac{\mu}{1 + \frac{\mu}{v_{sat}}\left| -\frac{d\psi}{dx} \right|} \frac{dV}{dx} \Rightarrow I_D \left[ 1 + \frac{\mu}{v_{sat}} \left| -\frac{d\psi}{dx} \right| \frac{dV_c dV_c du}{dV_c du dx} \right] = W|Q_{2D}|\mu \frac{dV_c dV_c du}{dV_c du dx} \\
&= -W|Q_{2D}|\mu \frac{C_q + C_{it} + CC_{dq}U_T du}{C} \frac{1}{C_q} \frac{dV_c dV_c du}{dx} \Rightarrow -W|Q_{2D}|\mu \frac{C_q + C_{it} + CC_{dq}U_T du}{C} \frac{1}{C_q} \frac{dV_c dV_c du}{dx} - I_D \frac{\mu}{v_{sat}} \frac{C_{dq}U_T C_q + C_{it}}{C} \\
\frac{|du|du}{du dx} = I_D \Rightarrow \frac{dx}{du} &= -\frac{W|Q_{2D}|\mu C_q + C_{it} + CC_{dq}U_T}{I_D} - \frac{\mu}{v_{sat}} \frac{C_{dq}U_T |du|}{C}
\end{aligned} \tag{S7}$$

where  $\mu_{eff}$  is the effective mobility after the degradation of low-field mobility  $\mu$  due to velocity saturation (VS) effect and  $E=-dV/dx$ ,  $E_x=-d\psi/dx$ ,  $E_c=u_{sat}/\mu$  represent the electric, horizontal and critical electric fields, respectively. The second term in penultimate line of Equation S7 is related with VS effect which becomes significant at elevated gate and drain voltages ( $V_{GS(B)}$ ,  $V_{DS}$ ), respectively<sup>54-55</sup> for 2D-FETs. Under such operating conditions,  $C_q$  dominates over  $C_{it}$  and hence,  $(C_q+C_{it})/C_q \approx 1$  at high charge density regime as presented in Fig. S1b. This approximation is applied in this VS-related term of Equation S7 as it is displayed in its last line. The  $IV$  parameters used for the simulations in Fig. S1b, are adapted from the DUT measured in the present study (cf. row 3 of Table S1 in Section S.6) but the same outcome is obtained for other parameters sets.<sup>33, 35, 38, 40, 42-43, 49</sup> If we multiply both terms of final expression of Equation S7 with  $du$  and integrate from source to drain we get:

$$I_D = \frac{\int_{u_s}^{u_d} -W|Q_{2D}|\mu C_{dq}U_T \frac{C_q + C_{it} + C}{C_q C} du - \frac{W\mu(C_{dq}U_T)^2}{C} \int_{u_d}^{u_s} u \frac{C_q + C_{it} + C}{C_q} du}{L + \frac{\mu C_{dq}U_T}{u_{sat}C} \int_{u_s}^{u_d} |du|} = \frac{L + \frac{\mu C_{dq}U_T}{u_{sat}C} |u_d - u_s|}{L + \frac{\mu C_{dq}U_T}{u_{sat}C} |u_d - u_s|} \tag{S8}$$

where  $u_s$ ,  $u_d$  are the source and drain side normalized charges, respectively, which can be easily calculated from Equation S2 after  $V_{cs}$ ,  $V_{cd}$  derivation. The denominator of Equation S8 corresponds to an effective effect  $L_{eff}$  that accounts for VS effect<sup>52-53</sup> while the numerator can be expanded as:

$$I_D = \frac{W\mu(C_{dq}U_T)^2}{CL_{eff}} \left[ \int_{u_d}^{u_s} u \frac{C_q + C}{C_q} du + \int_{u_d}^{u_s} u \frac{C_{it}}{C_q} du \right] \tag{S9}$$

where the first term in the brackets of Equation S9 has already been solved and used in the  $IV$  model<sup>63</sup> (Equation 5) and is given by:

$$I_{DA} = \frac{W\mu(C_{dq}U_T)^2}{CL_{eff}} \int_{u_d}^{u_s} u \frac{C_q + C}{C_q} du = \frac{W\mu C_{dq}U_T^2}{L_{eff}} \left[ \left( \frac{C_{dq} + C}{C} \right) \left( \frac{u_s^2 - u_d^2}{2} \right) + e^{-u_d} - e^{-u_s} \right] \tag{S10a}$$

while the second term equals to:

$$\begin{aligned}
I_{DB} &= \frac{W\mu(C_{dq}U_T)^2}{CL_{eff}} \int_{u_d}^{u_s} u \frac{C_{it}}{C_q} du = \frac{W\mu C_{dq}U_T^2 C_{it}}{CL_{eff}} \int_{u_d}^{u_s} \frac{u}{1-e^{-u}} du = \frac{W\mu C_{dq}U_T^2 C_{it}}{CL_{eff}} \left[ \text{uln}(1-e^u) + Li_2(e^u) \right]_{u_d}^{u_s} \approx \\
&\left[ \left( \frac{u_s^2 - u_d^2}{2} \right) + e^{-u_d} - e^{-u_s} \right] \quad (S10b)
\end{aligned}$$

Notice firstly that  $C_{it}/C_q$  integral in Equation S10b cannot be solved analytically thus, we approximate a uniform channel condition (low  $V_{DS}$ ) for  $C_{it}$  which is then considered equal to its value at source side ( $V_c(x)=V_{cs}$ ) all along the channel,  $C_{it}=e \cdot N_{it}/(2U_T \cdot (1+\cosh[(-V_{cs}-V_{it})/U_T]))^{63}$ , and thus, can be taken out of the integral leading to a compact formulation;  $N_{it}$ ,  $V_{it}$  are the effective interface trap density and energy, respectively used as  $IV$  model parameters<sup>63</sup>. Secondly,  $Li_2$  denotes the polylogarithm function of the second order and Equation S10b is solved after similar treatment with Equation S10a (cf. Equations 26-29 in Appendix of Ref. 60). Thus, the new more complete  $I_D$  expression is:

$$I_D = I_{DA} + I_{DB} = \frac{\mu W C_{dq} U_T^2}{L_{eff}} gvc, \quad gvc = \left[ \frac{C_{dq} + C_{it} + C u_s^2 - u_d^2}{C} + \frac{C_{it} + C}{C} (e^{-u_d} - e^{-u_s}) \right] \quad (S11)$$

Equation S7 becomes due to Equation S11:

$$\frac{dx}{du} = -|Q_{2D}| \frac{L_{eff}}{C U_T gvc} \frac{C_q + C_{it} + C}{C_q} - \frac{\mu C_{dq} U_T |du|}{v_{sat} C} \quad (S12)$$

which defines the relation between  $du$  and  $dx$  which will be proved very beneficial for the  $1/f$  noise derivations in the next Section.

## SECTION S.2 Secondary $IV$ effects included in the model

The  $IV$  model that is used in this work<sup>63</sup> has not contained until now various effects that can affect the experimental  $IV$  data. Such effects are: a) the  $V_{DS}$  dependence of threshold voltage- $V_{TH}$  (Drain Induced Barrier Lowering-DIBL), b) the  $V_{DS}$  dependence of contact resistance and c) the Channel Length Modulation (CLM) effect. Regarding DIBL, the following expression is added:<sup>61</sup>  $V_{TH}=V_{G(S)B0}-n_{DIBL}V_{DS}$  where  $n_{DIBL}$  (unitless) is a model parameter. The subsequent equation has also been implemented to describe the  $V_{DS}$  dependence of contact resistance:<sup>61</sup>  $R_{CS,D}=R_{CA}+R_{CB}V_{DS}^{bRC}$  where  $R_{CS,D}$  is the contact resistance at source and drain side, respectively and  $R_{CA}$  ( $\Omega$ ),  $R_{CB}$  ( $\Omega/V$ ),  $bRC$  (unitless) are used as model parameters. Finally, CLM has been included as:<sup>58</sup>  $I_{D,CLM}=I_D(1+\lambda V_{DS})$  where  $I_{D,CLM}$  is the drain current after the effect of CLM and  $\lambda$  ( $1/V$ ) is a model parameter.

## SECTION S.3 Thorough procedure for $1/f$ noise derivations

As described in Ref. 27 (Section 6.1.1), the adopted methodology for  $1/f$  noise derivations, considers a noiseless channel apart from an elementary slice between  $x$  and  $x+\Delta x$  as shown in Fig. S1c. This local noise contribution can be represented by a local current noise source with a Power Spectral Density (PSD)  $S_{\delta I_n}^2$  which is connected in parallel with the resistance  $\Delta R$  of the slice. The transistor then can be split into two noiseless transistors M1 and M2 on each

side of the local current noise source, at the source and drain side ends with channel lengths equal to  $x$  and  $L-x$  respectively. Since the voltage fluctuations on parallel resistance  $\Delta R$  are small enough compared to  $U_T$ , small signal analysis can be used in order to extract a noise model according to which, M1 and M2 can be replaced by two simple conductances  $G_S$  on the source and  $G_D$  on the drain side, respectively. The PSD of the drain current fluctuations  $S_{\delta I_{nD}}^2$  due to a single local noise source is given by:<sup>27</sup> (Equation 6.3)

$$S_{\delta I_{nD}}^2(\omega, x) = G_{CH}^2 \Delta R^2 S_{\delta I_n^2}(\omega, x) \quad (S13)$$

where  $\omega$  is the angular frequency and  $G_{GH}$  is the channel conductance at  $x$  where:<sup>27</sup> (Equation 6.2)

$$\frac{1}{G_{CH}} = \frac{1}{G_S} + \frac{1}{G_D} \quad (S14)$$

Total drain current noise PSD along the channel is obtained by summing the elementary contributions  $S_{\delta I_{nD}}^2$  in Equation S13 assuming that the contribution of each slice at different positions along the channel remains uncorrelated:<sup>27</sup> (Equations 6.4, 9.140)

$$S_{ID} = \int_0^L \frac{S_{\delta I_{nD}}^2(\omega, x)}{\Delta x} dx = \int_0^L G_{CH}^2 \Delta R^2 \frac{S_{\delta I_n^2}(\omega, x)}{\Delta x} dx = \int_0^L \left( \frac{W \mu_{eff} Q_{2D}}{L_{eff}} \frac{\Delta x}{W \mu_{eff} Q_{2D}} \right)^2 \frac{S_{\delta I_n^2}(\omega, x)}{\Delta x} dx = \frac{1}{L_{eff}^2} \int_0^L S_{\delta I_n^2}(\omega, x) dx \quad (S15)$$

Regarding Carrier Number Fluctuation effect ( $\Delta N$ ), the fluctuation of the trapped charge  $\delta Q_t$  (containing slow border traps that contribute to  $1/f$  noise) can cause an alteration in the chemical potential  $\delta V_c$  which results in a variation of all the charges that depend directly on  $V_c$  (top(back)-dielectric charge  $Q_{top(back)}$ ,  $Q_{2D}$  and  $Q_{it}$ ). By applying charge conservation law<sup>27</sup> (Equations 6.56-6.57)-28, 52 and by considering  $C_q$ ,  $C_{it}$  aforementioned definitions:

$$\delta Q_{2D} + \delta Q_{top} + \delta Q_{back} + \delta Q_{it} = \delta Q_t \rightarrow -(C_q \delta V_c + C_t \delta V_c + C_b \delta V_c + C_{it} \delta V_c) = \delta Q_t \rightarrow \frac{\delta Q_{2D}}{\delta Q_t} = \frac{C_q}{C_q + C + C_{it}} \quad (S16)$$

while relative current fluctuation equals, according to Equation S16, to:<sup>27</sup> (Equation 6.55)

$$\frac{\delta I_D(x)}{I_D} = \left( \frac{\delta N_{2D}}{N_{2D} \delta N_t} + \alpha_c e \mu \right) \delta N_t = \left( \frac{e}{Q_{2D}} \frac{\delta Q_{2D}}{\delta Q_t} + \alpha_c e \mu \right) \delta N_t = \left( \frac{e}{|Q_{2D}|} \frac{C_q}{C_q + C + C_{it}} + \alpha_c e \mu \right) \delta N_t \quad (S17)$$

where  $\alpha_c$  is the Coulomb scattering coefficient and  $N_{2D}$ ,  $N_t$  are the net mobile and border trapped charge densities, respectively. Local  $\Delta N$   $1/f$  noise is then calculated based on Equation S17 as:<sup>27</sup> (Equations 6.56-6.57, 6.64), 28, 52

$$\frac{S_{\delta I_n^2}}{I_D^2} f |_{\Delta N} = \left( \frac{e}{|Q_{2D}|} \frac{C_q}{C_q + C + C_{it}} + \alpha_c e \mu \right)^2 S_{\delta N_t^2} \quad (S18)$$

where  $f$  is the frequency and  $S_{\delta N_t^2} = KTN_{ST}/W \Delta x f$  the trap density fluctuation PSD<sup>27</sup> (Equation 6.65) with  $W$  the width of the device and  $N_{ST}$  the slow border trap density per unit energy in  $eV$

$1.cm^{-2}$ ;  $N_{ST}$  and  $\alpha_c$  are used as  $\Delta N$   $1/f$  noise model parameters. The first term in the right-hand parenthesis expresses the genuine carrier number fluctuation due to trapping/detrapping while the second signifies the correlated mobility fluctuation induced by the influence of trapping on Coulomb scattering mechanism (CMF).<sup>27-32</sup> Total  $\Delta N$   $1/f$  noise normalized with squared drain current can be derived from Equations S15, S18 as:

$$\frac{S_{I_D}}{I_D^2} f|_{\Delta N} = \frac{KTN_{ST}}{WL_{eff}^2} \int_0^L \left( \frac{e C_q}{|Q_{2D}| C_q + C_{it} + C} + \alpha_c e \mu \right)^2 dx = \frac{KTN_{ST}}{WL_{eff}^2} \left[ \int_0^L \left( \frac{e C_q}{|Q_{2D}| C_q + C_{it} + C} \right)^2 dx + \int_0^L (\alpha_c e \mu)^2 dx + \right. \\ \left. \right] \quad (S19)$$

The integral in Equation S19 can be split into three integrals named  $\Delta N1$ ,  $\Delta N2$  and  $\Delta N3$  where  $\Delta N = \Delta N1 + \Delta N2 + \Delta N3$ . It is critical here to alter the integral variable from  $x$  to  $u$  (cf. Equation S12) in order to solve the integrals in a compact way as fundamental quantities of the  $IV$  model like  $Q_{2D}$ ,  $C_q$ , which are contained in  $1/f$  noise derivations, are expressed in terms of  $u$ .  $\Delta N1$  is calculated, if the aforementioned integral variable change is applied, as:

$$\Delta N1 = \frac{KTN_{ST}}{WL_{eff}^2} \int_{u_s}^{u_d} \left[ \left( \frac{e C_q}{|Q_{2D}| C_q + C_{it} + C} \right)^2 \right] \left[ -|Q_{2D}| \frac{L_{eff} C_q + C_{it} + C}{CU_T gvc} - \frac{\mu C_{dq} U_T}{v_{sat} C} \right] |du| \quad (S20)$$

where  $\Delta N1$  is again divided into two integrals as  $\Delta N1 = \Delta N1A - \Delta N1B$ :

$$\Delta N1A = \frac{KTN_{ST}}{WL_{eff}^2} \int_{u_d}^{u_s} \left[ \left( \frac{e C_q}{|Q_{2D}| C_q + C_{it} + C} \right)^2 \right] \left[ |Q_{2D}| \frac{L_{eff} C_q + C_{it} + C}{CU_T gvc} \right] du \quad (S21a)$$

$$\Delta N1B = \frac{KTN_{ST}}{WL_{eff}^2} \int_{u_s}^{u_d} \left[ \left( \frac{e C_q}{|Q_{2D}| C_q + C_{it} + C} \right)^2 \right] \left[ \frac{\mu C_{dq} U_T}{v_{sat} C} \right] |du| \quad (S21b)$$

$\Delta N2$  is calculated as:

$$\Delta N2 = \frac{KTN_{ST}}{WL_{eff}^2} \int_0^L (\alpha_c e \mu)^2 dx = \frac{KTN_{ST}}{WL_{eff}^2} (\alpha_c e \mu)^2 \int_0^L dx = \frac{KTN_{ST} L}{WL_{eff}^2} (\alpha_c e \mu)^2 \quad (S22)$$

and it does not require the integral variable change to be solved, as the quantity inside the integral area is constant and can be taken out.  $\Delta N3$  is estimated, if the integral variable change presented in Equation S12 is applied, as:

$$\Delta N3 = \frac{KTN_{ST}}{WL_{eff}^2} \int_{u_s}^{u_d} \left[ 2 \frac{\alpha_c e^2 \mu C_q}{|Q_{2D}| C_q + C_{it} + C} \right] \left[ -|Q_{2D}| \frac{L_{eff} C_q + C_{it} + C}{CU_T gvc} - \frac{\mu C_{dq} U_T}{v_{sat} C} \right] |du| \quad (S23)$$

where  $\Delta N3$  is again divided into two integrals as  $\Delta N3 = \Delta N3A - \Delta N3B$ :

$$\Delta N3A = \frac{KTN_{ST}}{WL_{eff}^2} \int_{u_d}^{u_s} \left[ 2 \frac{\alpha_c e^2 \mu C_q}{|Q_{2D}| C_q + C_{it} + C} \right] \left[ |Q_{2D}| \frac{L_{eff} C_q + C_{it} + C}{CU_T gvc} \right] du = \frac{2KTN_{ST} e^2 \alpha_c \mu (u_s - u_d)}{WL_{eff} CU_T gvc} \quad (S24a)$$

$$\Delta N3B = \frac{KTN_{ST}}{WL_{eff}^2} \int_{u_s}^{u_d} \left[ 2 \frac{\alpha_c e^2 \mu}{|Q_{2D}| C_q + C_{it} + C} \left[ \frac{\mu C_{dq} U_T}{v_{sat} C} \right] \right] |du| \quad (S24b)$$

The integrals of Equations S21, S24b are presented below after considering  $Q_{2D}$ ,  $C_q$  and  $C_{it}$  definitions cited before. Thus, initially  $\Delta N1A$  is extracted as:

$$\Delta N1A = \frac{KTN_{ST} e^2}{WL_{eff}^2} \int_{u_d}^{u_s} \frac{L_{eff}}{C_{dq} U_T^2 C g v c u (1 - e^{-u} + C2)} \frac{1 - e^{-u}}{1 - e^{-u} + C2} du \approx \frac{KTN_{ST} e^2}{WL_{eff} C_{dq} U_T^2 C g v c} \int_{u_d}^{u_s} \frac{1}{u + c2(1 + u)} du \quad (S24)$$

where  $1 - e^{-u} \approx u/(1+u)$  approximation is considered in order to obtain an analytical solution while  $C2 = (C + C_{it})/C_{dq}$ . The accuracy of the applied approximation is presented in Fig. S2a for a wide range of  $u$  values where the  $IV$  parameters used are from the DUT measured in the present study (cf. row 3 of Table S1 in Section S.6), but identical performance is obtained if other parameters sets are used.<sup>33, 35, 38, 40, 42-43, 49</sup> Then  $\Delta N1B$  is derived:

$$\Delta N1B = \frac{KTN_{ST} e^2 \mu}{WL_{eff}^2 v_{sat} C C_{dq} U_T u_s} \int_{u_s}^{u_d} \left( \frac{1 - e^{-u}}{u(1 - e^{-u} + C2)} \right)^2 |du| \approx \frac{KTN_{ST} e^2 \mu}{WL_{eff}^2 v_{sat} C C_{dq} U_T u_s} \int_{u_s}^{u_d} \left( \frac{1}{u + c2(1 + u)} \right)^2 du \quad (S25)$$

where again  $1 - e^{-u} \approx u/(1+u)$  is accurately considered (cf. Fig. S2b). Afterwards  $\Delta N3B$  is estimated as:

$$\Delta N3B = \frac{2KTN_{ST} e^2 \alpha_c \mu^2}{WL_{eff}^2 v_{sat} C} \int_{u_s}^{u_d} \frac{1 - e^{-u}}{u(1 - e^{-u} + C2)} |du| \approx \frac{2KTN_{ST} e^2 \alpha_c \mu^2}{WL_{eff}^2 v_{sat} C} \int_{u_s}^{u_d} \frac{1}{u + c2(1 + u)} |du| \quad (S26)$$

which ends up in the same integral as in  $\Delta N1A$  case thus, it is solved similarly.

Regarding Mobility Fluctuation effect ( $\Delta\mu$ ), local  $\Delta\mu$   $1/f$  noise is calculated as:<sup>27 (Equation 6.75)</sup>

$$\frac{S_{\delta I_n^2}}{I_D^2} f |_{\Delta\mu} = \frac{\alpha_H e}{|Q_{2D}| W \Delta x} \quad (S27)$$

Total  $\Delta\mu$   $1/f$  noise normalized with squared drain current can be derived from Equations S12, S15 and S27:

$$\frac{S_{I_D}}{I_D^2} f |_{\Delta\mu} = \frac{\alpha_H e}{WL_{eff}^2} \int_0^L \frac{1}{|Q_{2D}|} dx = \frac{\alpha_H e}{WL_{eff}^2} \int_{u_s}^{u_d} \frac{1}{|Q_{2D}|} \left[ -|Q_{2D}| \frac{L_{eff}}{C U_T g v c} \frac{C_q + C_{it} + C}{C_q} - \frac{\mu C_{dq} U_T}{v_{sat} C} \right] |du| \quad (S28)$$

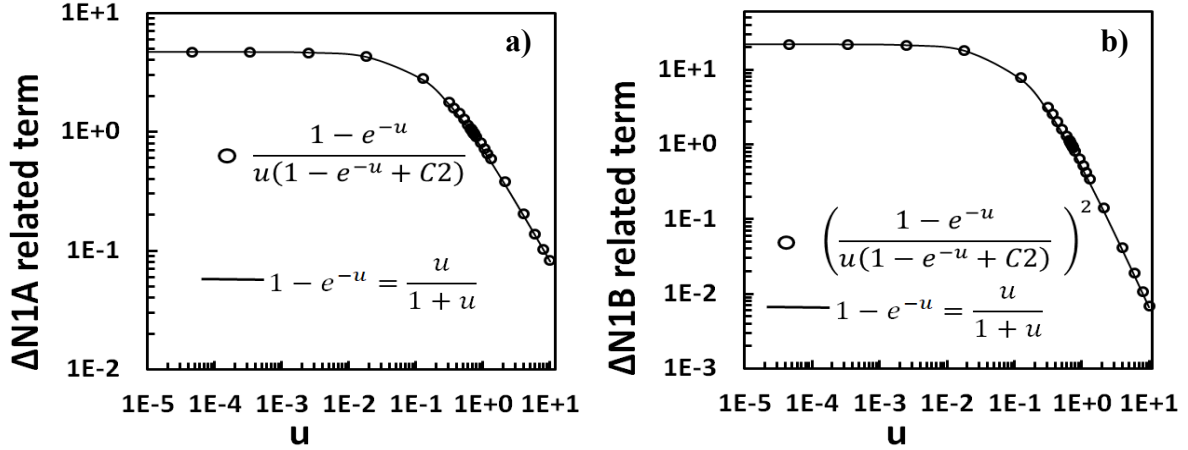

**Fig. S2.**  $1/f$  noise  $\Delta N1A$  (a) and  $\Delta N1B$  (b) related terms vs.  $u$  where markers represent the original derived expression and lines the  $1-e^{-u} \approx u/(1+u)$  approximation.

where  $\alpha_H$  is the unitless Hooge parameter used as  $\Delta\mu$   $1/f$  noise model parameter. The integral in Equation S28 is divided into two integrals as  $\Delta\mu = \Delta\mu A - \Delta\mu B$ :

$$\Delta\mu A = \frac{\alpha_H e}{WL_{eff}^2} \int_{u_d}^{u_s} \frac{1}{|Q_{2D}|} \left[ \frac{L_{eff} C_q + C_{it} + C}{CU_T g_{vc} C_q} \right] du = \frac{\alpha_H e}{WL_{eff} CU_T g_{vc}} \int_{u_d}^{u_s} \frac{1 - e^{-u} + C2}{1 - e^{-u}} du \quad (S29a)$$

$$\Delta\mu B = \frac{\alpha_H e}{WL_{eff}^2} \int_{u_s}^{u_d} \frac{1}{|Q_n|} \left[ \frac{\mu C_{dq} U_T}{v_{sat} C} \right] |du| = \frac{\alpha_H e \mu}{CWL_{eff}^2 v_{sat} u_s} \int_{u_s}^{u_d} \frac{1}{u} |du| \quad (S29b)$$

For the  $\Delta R$   $1/f$  noise model cited in Equation 11 of the main manuscript, source and drain transconductances are calculated as:

$$g_{ms,d} = \frac{\partial I_D}{\partial u_{s,d}} \frac{\partial u_{s,d}}{\partial V_{cs,d}} \frac{\partial V_{cs,d}}{\partial V_{gs}} = \frac{\mu_{eff} W C_{dq} U_T^2}{L} \left[ (C_{dq} + C + C_{it}) u_{s,d} + (C + C_{it}) e^{-u_{s,d}} \right] \frac{1 - e^{-u_{s,d}}}{U_T} \frac{C_t}{C + C_{it} + C_{dq}} \quad (S30)$$

#### SECTION S.4 $IV$ parameter extraction procedure

Fundamental  $IV$  parameters such as  $\mu$ ,  $V_{GBO}$ ,  $N_{it}$ ,  $V_{it}$  and  $R_{CA}$  are extracted from low  $V_{DS}$  regime. In more detail,  $\mu = g_{mmax} L / (V_{DS} \cdot W \cdot C_b)^{65}$  where  $g_m$  is the device transconductance while  $N_{it}$ ,  $V_{it}$  are derived from the subthreshold slope  $SS = (C_{itSS} / C_b + 1) U_T \ln(10)^{40, 46}$  where in subthreshold region, interface trap capacitance is approximated as  $C_{itSS} = n_{it} \cdot e / U_T^{40, 46}$  and  $n_{it}$  is the interface trap density which is related with  $N_{it}$ ,  $V_{it}$  parameters as  $n_{it} = N_{it} / (1 + e^{-(V_c - V_{it}) / U_T})^{63}$ . Then,  $V_{GBO}$ ,  $R_{CA}$  can be obtained by fitting the model with experiments at low and high  $I_D$  regime, respectively. Parameters such as  $n_{DIBL}$ ,  $u_{sat}$ ,  $\lambda$ , can be estimated from high  $V_{DS}$  region if sufficient experiments are available. Thus,  $n_{DIBL}$  is zero when there is not a  $V_{DS}$  dependence of measured  $V_{TH}^{33, 35, 38, 40, 42-43}$  while it is adjusted appropriately to capture this  $V_{DS}$  dependence in case it is noticed.<sup>49, 65</sup>  $u_{sat}$  is derived from high  $V_{GS(B)}^{55}$  with values around  $5 \cdot 10^5 - 5 \cdot 10^6$  cm/s in agreement with bibliography for every case while in some occasions, CLM is observed usually in output characteristics and thus,  $\lambda$  is extracted.<sup>33, 38, 40, 42</sup> Finally in the DUT under test<sup>65</sup> where



intermediate  $V_{DS}$  values are also included in the measurement setup, the extraction of the above parameters for low (0.1-0.2 V) and high (0.9-1 V)  $V_{DS}$  does not provide an acceptable fitting for the rest of  $V_{DS}$  points and thus  $V_{DS}$ -dependent  $R_{CB}$ ,  $bRC$  parameters are adjusted in order to achieve a remarkable performance of the  $IV$  model for every  $V_{DS}$  region.

### SECTION S.5 $IV$ and $1/f$ noise plots of 2D-FETs

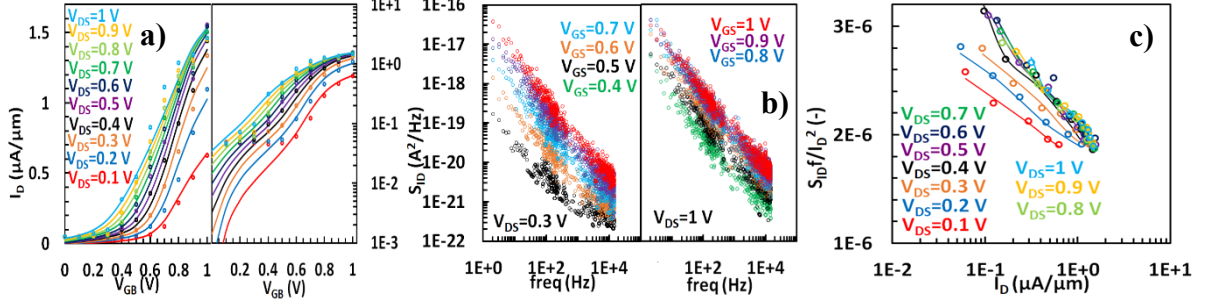

**Fig. S3.** a) Transfer characteristics at drain voltage  $V_{DS}=0.1$  to  $1$  V (step  $0.1$  V) at linear (left subplot) and logarithmic (right subplot) y-axis, b) Relative Power Spectral Density (PSD) of drain current noise  $S_{ID}$  for back-gate voltage  $V_{GB}=0.4$  to  $1$  V (step  $0.1$  V) at  $V_{DS}=0.3, 1$  V (left, right subplot, respectively) and c)  $S_{ID}/I_D^2$  vs. normalized drain current  $I_D$  at  $V_{DS}=0.1$  to  $1$  V ( $0.1$  V step) for Li-ion glass substrate SL  $\text{MoS}_2$  FET<sup>65</sup> with width  $W=4 \mu\text{m}$  and length  $L=1 \mu\text{m}$ . Markers: measurements, lines: model.

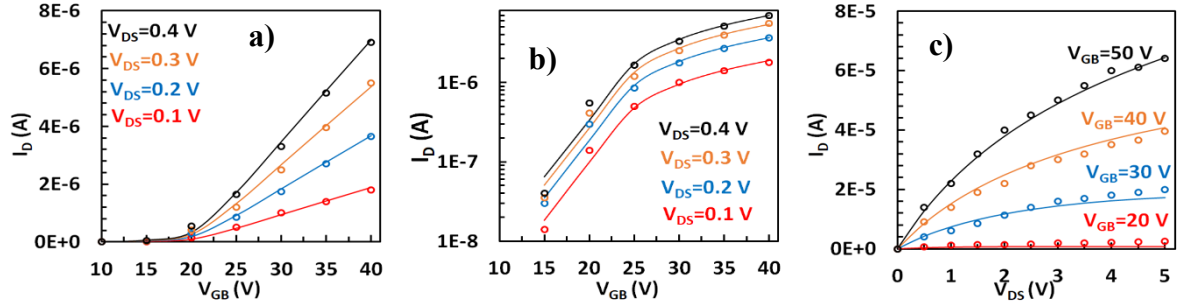

**Fig. S4.**  $I_D$  vs.  $V_{GB}$  at a) linear, b) logarithmic y-axis at  $V_{DS}=0.1, 0.2, 0.3$  and  $0.4$  V and c) vs.  $V_{DS}$  at  $V_{GB}=20, 30, 40$  and  $50$  V for 10-layer  $\text{MoSe}_2$  FET<sup>38</sup> with  $W=2 \mu\text{m}$  and  $L=2 \mu\text{m}$ . Markers: measurements, lines: models.

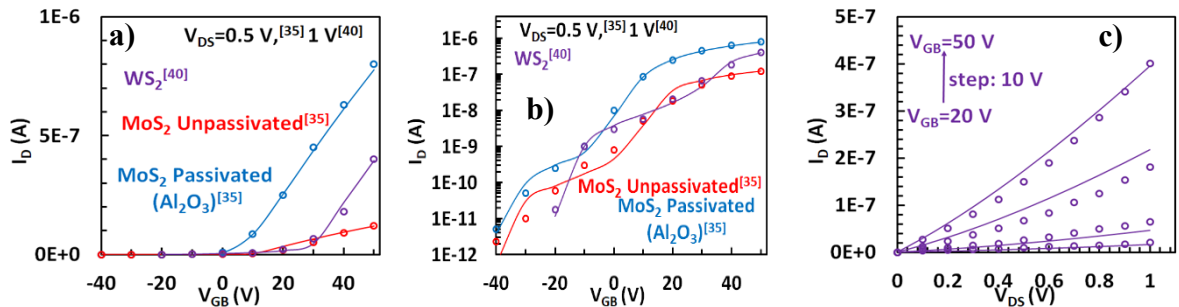

**Fig. S5.**  $I_D$  vs.  $V_{GB}$  at a) linear and b) logarithmic y-axis for  $\text{Al}_2\text{O}_3$  passivated (blue) and unpassivated (red) single-layer (SL)  $\text{MoS}_2$  FET<sup>35</sup> with  $W=1 \mu\text{m}$  and  $L=0.4 \mu\text{m}$  at  $V_{DS}=0.5$  V and for a SL  $\text{WS}_2$  FET<sup>40</sup> (magenta) with  $W=27 \mu\text{m}$  and  $L=2 \mu\text{m}$  at  $V_{DS}=1$  V. c)  $I_D$  vs.  $V_{DS}$  for the  $\text{WS}_2$  FET<sup>40</sup> at  $V_{GB}=20, 30, 40$  and  $50$  V. Markers: measurements, lines: models.

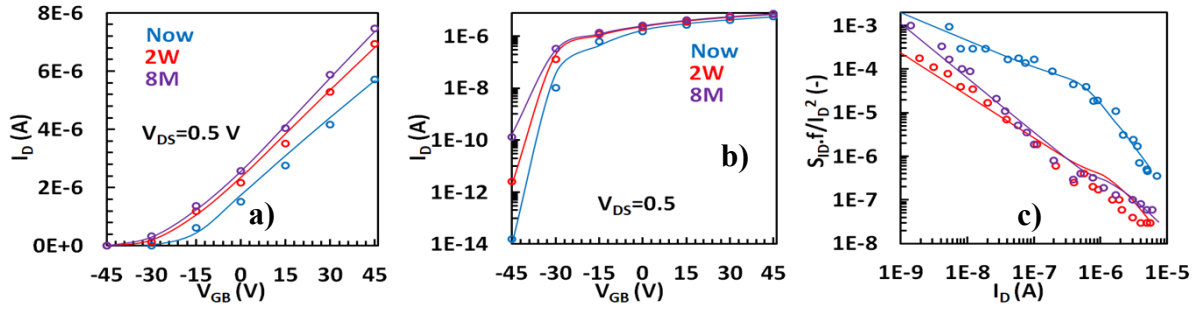

**Fig. S6.**  $I_D$  vs.  $V_{GB}$  at a) linear, b) logarithmic y-axis and c) output noise divided by squared drain current  $S_{Idf}/I_D^2$  vs.  $I_D$  for a SL MoS<sub>2</sub> FET<sup>43</sup> exactly (blue), 2 weeks (red) and 8 months (magenta) after fabricated and placed in vacuum system with  $W=10 \mu\text{m}$  and  $L=25 \mu\text{m}$  at  $V_{DS}=0.5 \text{ V}$ . Markers: measurements, lines: model.

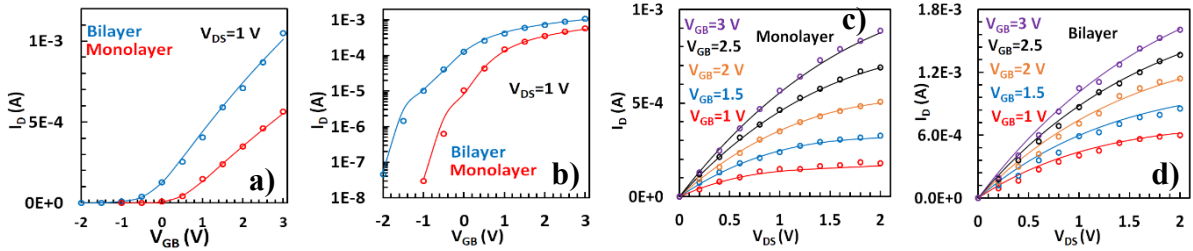

**Fig. S7.**  $I_D$  vs.  $V_{GB}$  at a) linear, b) logarithmic y-axis for bilayer (BL) (blue) and SL (red) MoS<sub>2</sub> FET<sup>49</sup> with  $W=15 \mu\text{m}$  and  $L=0.3 \mu\text{m}$  at  $V_{DS}=1 \text{ V}$  and  $I_D$  vs.  $V_{DS}$  for c) the SL and d) the BL device at  $V_{GB}=1, 1.5, 2, 2.5$  and  $3 \text{ V}$ . Markers: measurements, lines: models.

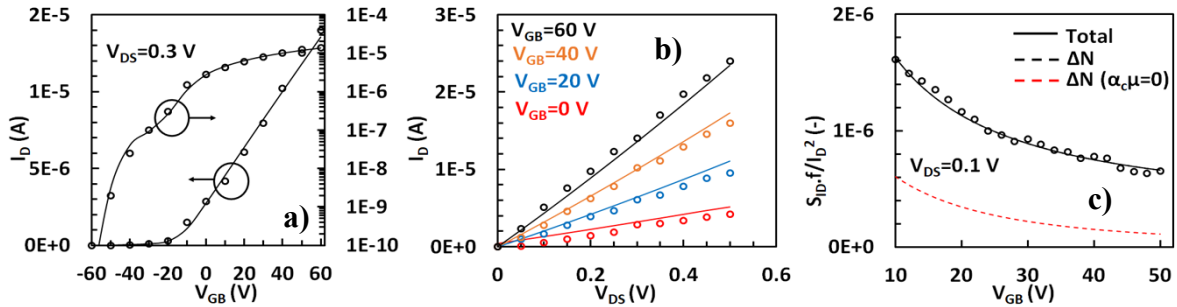

**Fig. S8.**  $I_D$  vs. a)  $V_{GB}$  in linear (left) and logarithmic (right) y-axis for  $V_{DS}=0.3 \text{ V}$ , vs. b)  $V_{DS}$  for  $V_{GB}=0, 20, 40$  and  $60 \text{ V}$  and c)  $S_{Idf}/I_D^2$  vs.  $V_{GB}$  at  $V_{DS}=0.1 \text{ V}$  for a SL MoS<sub>2</sub> FET<sup>33</sup> with  $W=3.32 \mu\text{m}$  and  $L=1.71 \mu\text{m}$ . Markers: measurements, solid lines: model, dashed lines: Carrier number fluctuation  $\Delta N$  model with (black) and without (red) CMF effect ( $\alpha_c \mu$ ).

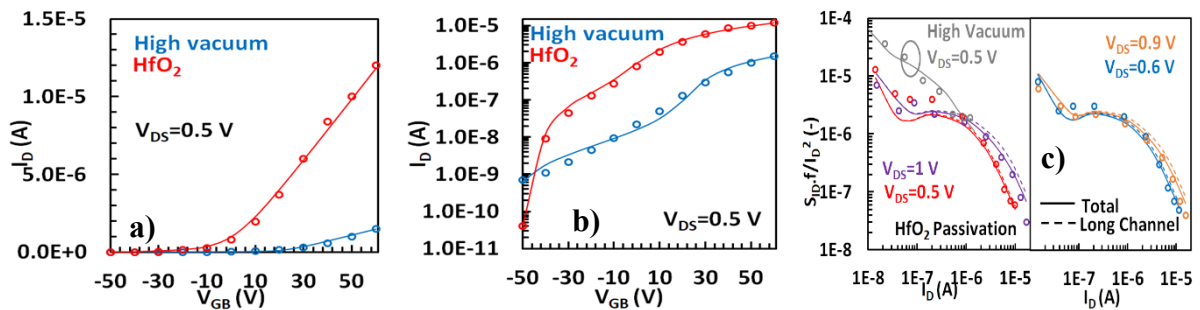

**Fig. S9.**  $I_D$  vs.  $V_{GB}$  at a) linear, b) logarithmic y-axis at  $V_{DS}=0.5 \text{ V}$  at high vacuum (blue) and after HFO<sub>2</sub> passivation (red) and c)  $S_{Idf}/I_D^2$  vs.  $I_D$  after HFO<sub>2</sub> passivation at  $V_{DS}=0.5$  (red),  $0.6$  (blue),  $0.9$  (orange) and  $1 \text{ V}$  (magenta), for a 7-layer MoTe<sub>2</sub> FET<sup>42</sup> with  $W=5.5 \mu\text{m}$  and  $L=2 \mu\text{m}$ .  $S_{Idf}/I_D^2$  is also shown at high vacuum case (grey) at  $V_{DS}=0.5 \text{ V}$ . Markers: measurements, lines: models, dashed lines: long channel model.

## SECTION S.6 Tables with $I/V$ and $1/f$ noise model parameters

Table S1.  $I/V$  Model Parameters

| Param          | W       | L       | C               | $\mu$           | $V_{GBO}$ | $n_{DIBL}$ | $u_{sat}$ | $N_{it}$       | $V_{it}$ | $R_{CA}$   | $R_{CB}$   | $b_{RC}$ | $\lambda$ |
|----------------|---------|---------|-----------------|-----------------|-----------|------------|-----------|----------------|----------|------------|------------|----------|-----------|
| Units          | $\mu m$ | $\mu m$ | $\mu F cm^{-2}$ | $cm^2(Vs)^{-1}$ | V         | -          | cm/s      | $cm^{-2}$      | eV       | $\Omega$   | $\Omega/V$ | -        | $1/V$     |
| [64]           | 4       | 1       | 2.17            | 20              | 0.26      | 0.45       | $2.10^4$  | $6.5.10^{12}$  | 0.117    | 4871       | $6.3.10^4$ | 1.29     | 0         |
| [38]           | 2       | 2       | 0.0384          | 27              | 5.43      | 0          | $4.10^3$  | $3.6.10^{12}$  | 0.14     | $1.10^3$   | 0          | 1        | 0.05      |
| [35] Unpas     | 1       | 0.4     | 0.0121          | 0.25            | -40       | 0          | $1.10^4$  | $3.8.10^{12}$  | 0.2      | $4.10^5$   | 0          | 1        | 0         |
| [35] $Al_2O_3$ | 1       | 0.4     | 0.41            | 1.5             | -32       | 0          | $1.10^4$  | $2.5.10^{12}$  | 0.21     | $4.5.10^4$ | 0          | 1        | 0         |
| [40]           | 27      | 2       | 0.0115          | 0.18            | -20       | 0          | $1.10^4$  | $3.95.10^{12}$ | 0.155    | $6.10^5$   | 0          | 1        | 0.95      |
| [49]-1L        | 15      | 0.3     | 11.2            | 5.4             | -0.72     | 0.18       | $1.10^4$  | $6.10^{12}$    | 0.09     | 120        | 0          | 1        | 0         |
| [49]-2L        | 15      | 0.3     | 11.2            | 10              | -1.55     | 0.35       | $8.10^3$  | $8.10^{12}$    | 0.08     | 120        | 0          | 1        | 0         |
| [43] Now       | 10      | 25      | 0.0115          | 43              | -44.55    | 0          | $1.10^4$  | $1.9.10^{12}$  | 0.14     | $3.5.10^3$ | 0          | 1        | 0         |
| [43] 2W        | 10      | 25      | 0.0115          | 54              | -44.68    | 0          | $1.10^4$  | $2.10^{12}$    | 0.08     | $4.10^3$   | 0          | 1        | 0         |
| [43] 8M        | 10      | 25      | 0.0115          | 61              | -44.82    | 0          | $1.10^4$  | $2.2.10^{12}$  | 0.07     | $4.10^3$   | 0          | 1        | 0         |
| [33]           | 3.32    | 1.71    | 0.0115          | 27              | -59.7     | 0          | $2.10^4$  | $3.3.10^{12}$  | 0.145    | 500        | 0          | 1        | 0.3       |
| [42] H. Vac.   | 5.5     | 2       | 0.0115          | 2.4             | -57       | 0          | $8.10^3$  | $5.7.10^{12}$  | 0.153    | 120        | 0          | 1        | 0.06      |
| [42] $HfO_2$   | 5,5     | 2       | 0.45            | 12              | -40       | 0          | $4.10^3$  | $2.33.10^{12}$ | 0.11     | 120        | 0          | 1        | 0.35      |

Table S2.  $1/f$  noise Model Parameters

| Param          | $N_{ST}$         | $\alpha_c$  | $\alpha_H$    | $S_{\Delta R}^2$  |
|----------------|------------------|-------------|---------------|-------------------|
| Units          | $eV^{-1}cm^{-2}$ | V.s/C       | -             | $\Omega^2Hz^{-1}$ |
| [64]           | $1.10^{11}$      | $1.61.10^6$ | $3.10^{-3}$   | 0                 |
| [38]           | $1.35.10^{10}$   | $1.35.10^6$ | $1.3.10^{-3}$ | 50                |
| [35] Unpas     | $4.10^{11}$      | $510^7$     | $1.8.10^{-2}$ | 0                 |
| [35] $Al_2O_3$ | $5.10^{10}$      | $1.10^3$    | $1.4.10^{-3}$ | 0                 |
| [40]           | $8.10^{12}$      | $5.10^7$    | 0.12          | 0                 |
| [49]-1L        | $1.10^{13}$      | $1.10^3$    | $9.10^{-2}$   | 0                 |
| [49]-2L        | $9.10^{12}$      | $1.10^3$    | $1.3.10^{-3}$ | 0                 |
| [43] Now       | $1.10^{15}$      | $1.10^3$    | $1.10^{-5}$   | 0                 |
| [43] 2W        | $4.10^{13}$      | $1.10^3$    | $1.10^{-5}$   | 0                 |
| [43] 8M        | $3.10^{13}$      | $1.10^4$    | $1.10^{-5}$   | 0                 |
| [33]           | $4.10^{12}$      | $9.10^4$    | $1.10^{-5}$   | 0                 |
| [42] H. Vac.   | $5.5.10^{12}$    | $1.10^6$    | 0.13          | 0                 |
| [42] $HfO_2$   | $3.10^{12}$      | $1.10^3$    | $6.10^{-4}$   | 0                 |

Extracted  $IV$  parameters of the measured DUT<sup>65</sup> ( $\mu$ ,  $V_{GBO}$  and  $R_C$ ), derived here, are akin to those presented in Ref. 65 while trap-related ones ( $N_{it}$  and  $V_{it}$ ) vary, which can be justified by the different measurement conditions which are probable to induce additional trap effects. Regarding the extracted  $1/f$  noise parameter,  $N_{ST}$  is similar<sup>36</sup> or lower than other SL to FL MoS<sub>2</sub> FETs reported in literature<sup>37, 43, 46, 49</sup> while the strong  $\alpha_c$  (in comparison with values in the range of  $1.10^3$ - $1.10^4$  Vs/C reported in MOSFETs<sup>23, 27</sup> (Section 6.3)) has been already recorded in similar 2D-FETs.<sup>35</sup> Extracted  $\alpha_H$  is also close<sup>35,38</sup> or decreased<sup>40, 49</sup> in comparison with literature. Besides, for the MoSe<sub>2</sub> FET of Ref. 38, a low  $N_{ST}$  and a significant  $\alpha_c$  are recorded while  $\alpha_H$  is relatively close to the value reported in the initial study. Furthermore, as far as the devices of Refs 35, 40 are concerned,  $N_{ST}$ ,  $\alpha_H$  are larger in WS<sub>2</sub> device with the unpassivated MoS<sub>2</sub> to follow and the top-passivated to demonstrate the lower values. Note that the passivated SL MoS<sub>2</sub> FET does not display a significant  $CMF$  effect in contrast to the other two devices which present an equivalently strong  $\alpha_c\mu$  product.  $N_{ST}$ ,  $\alpha_c$  parameters extracted here are similar with those in Ref. 40 for the WS<sub>2</sub> device while no information regarding these parameters is provided in Ref. 35 for the MoS<sub>2</sub> FETs under discussion. The simplified  $(1+\alpha_c\mu C_{t,b} I_D/g_m)^2(g_m/I_D)^2 \Delta N$  model (uniform channel approximation), which is applied in both Refs 35, 40, is not accurate for the unpassivated MoS<sub>2</sub> FET<sup>35</sup> while even though it fits acceptably the data for the passivated MoS<sub>2</sub> FET<sup>35</sup> and the WS<sub>2</sub> FET,<sup>40</sup> it is validated for only one  $V_{DS}$  value. Regarding the devices of Refs 43, 49,  $\alpha_c$  is imperceptible everywhere while HFLaO (SL-BL) MoS<sub>2</sub> FETs exhibit a quite reduced (2 decades)  $N_{ST}$  parameter in comparison with the just fabricated SiO<sub>2</sub> SL MoS<sub>2</sub> FET confirming that the high-k dielectric presents weaker trapping effects.  $\alpha_H$  parameter has a moderate effect on high-k dielectric FETs while it is negligible in SiO<sub>2</sub> devices.  $N_{ST}$  parameter extracted here for both HFLaO<sup>49</sup> and SiO<sub>2</sub><sup>43</sup> 2D-FETs, is quite close to the values recorded in Refs 43, 49, respectively, where again a simplified  $(g_m/I_D)^2 \Delta N$  model is applied. Finally, for the device of Ref. 33, an intense  $N_{ST}$  is recorded which dominates  $1/f$  noise with a moderate contribution from  $\alpha_c$  while  $\alpha_H$  is negligible.
